# Supplementary material for: [Retracted] The Risk Model Based on the Three Oxidative Stress‐Related Genes Evaluates the Prognosis of LAC Patients
Source: Hindawi journal article supplement (doi:10.1155/2022/4022896), 2022-01-01
Supplement: f1 [file 4022896.f1.docx]

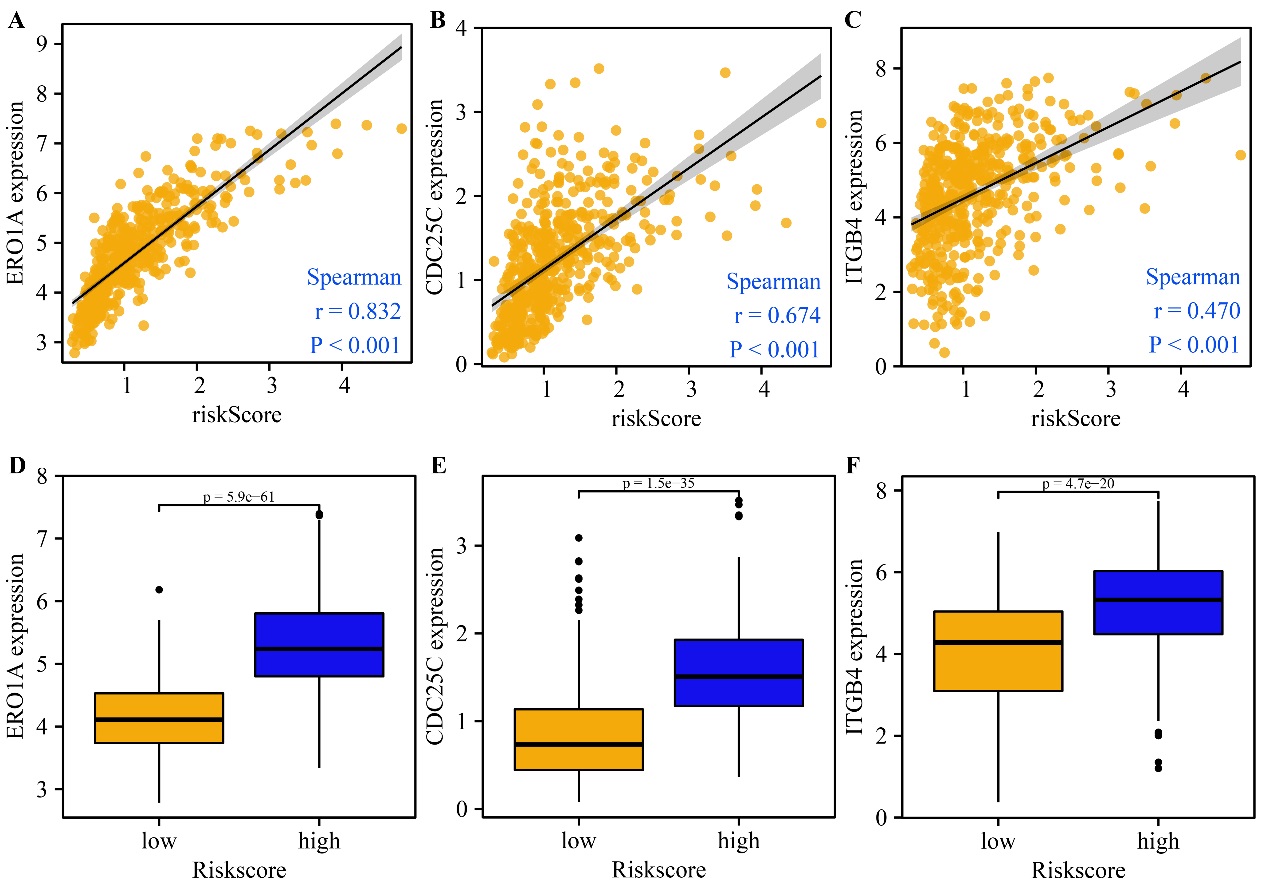
Figure S1. The expression levels of oxidative stress-related the DEGs are significantly correlated with the risk score.

Note: LAC, lung adenocarcinoma; DEGs, differentially expressed genes.


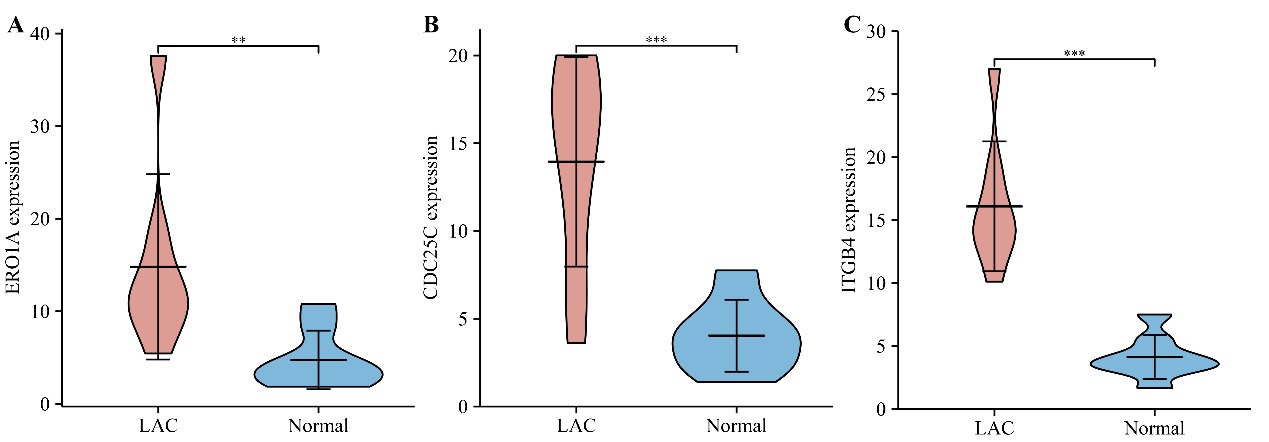


Figure S2. Identification of risk model gene expression in LAC tissues. (A) ERO1A; (B) CDC25C; (C) ITGB4.

Note: LAC, lung adenocarcinoma.


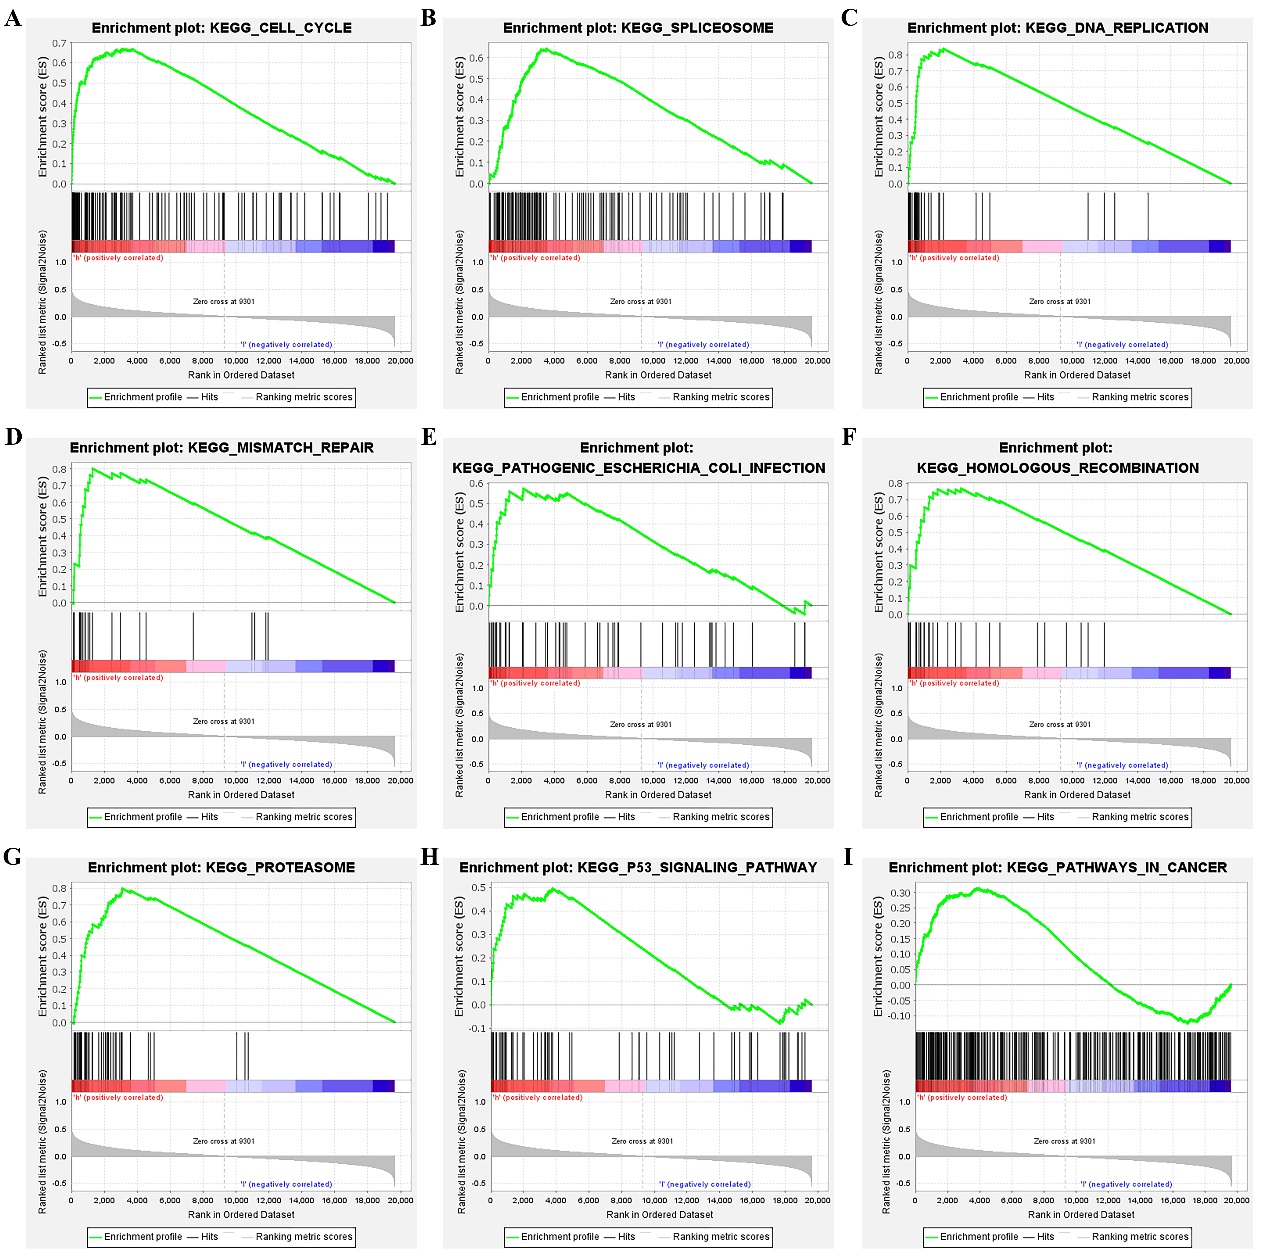


Figure S3. The signaling mechanisms of oxidative stress-related the DEGs.

Note: DEGs, differentially expressed genes.


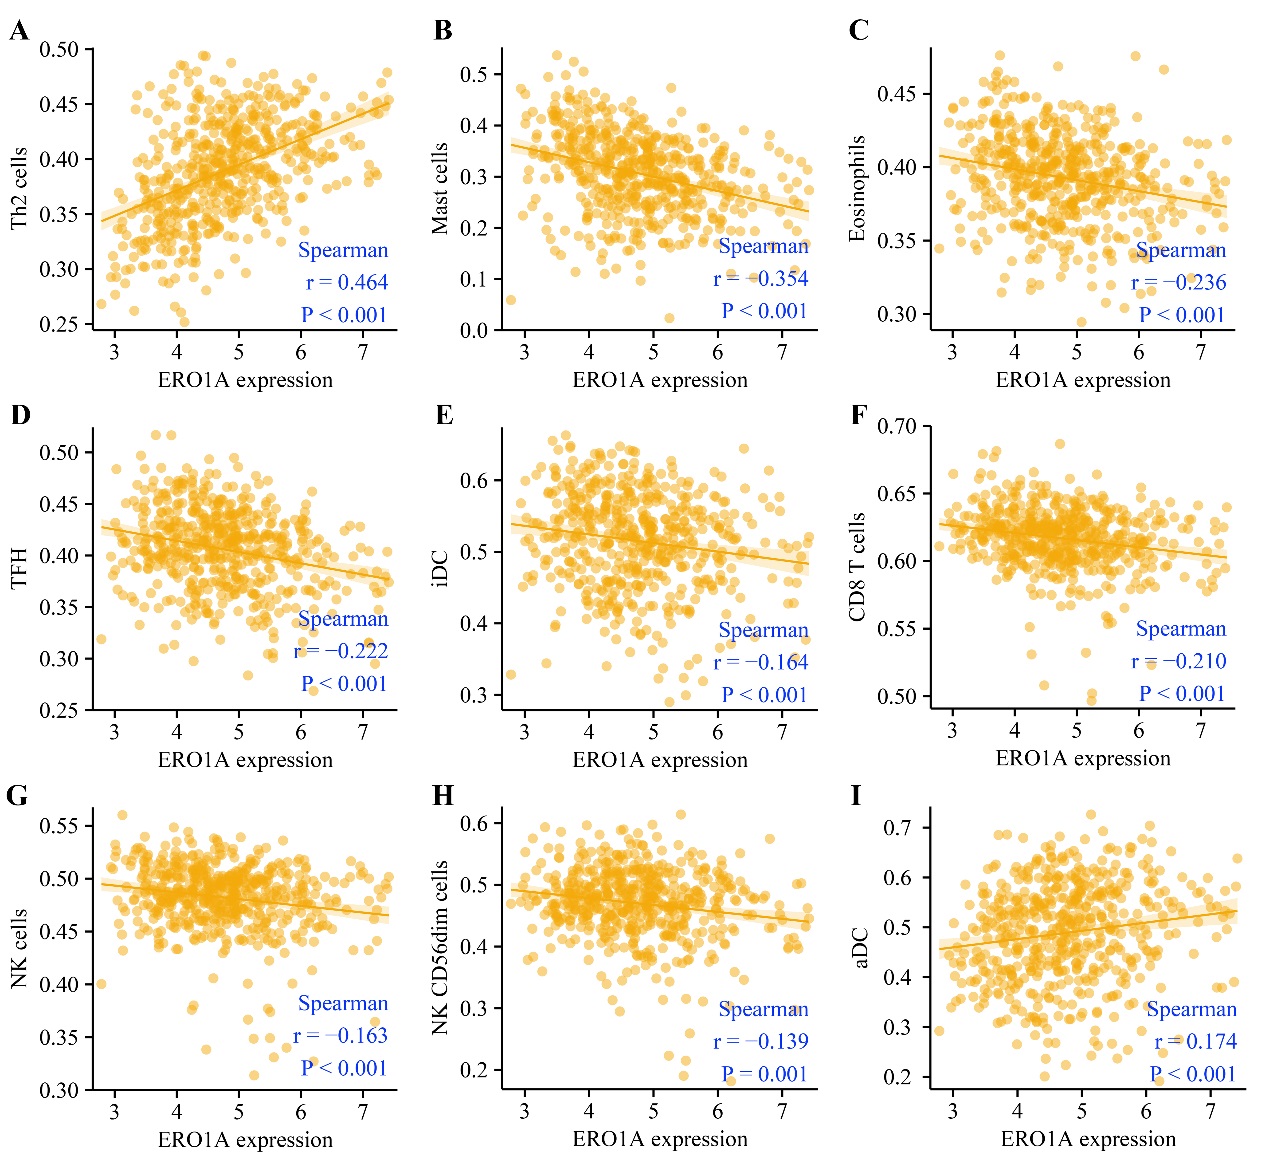


Figure S4. The expression level of *ERO1A* correlates with the levels of immune infiltrating cells. (A) Th2 cells; (B) Mast cells; (C) Eosinophils; (D) TFH; (E) iDC; (F) CD8 T cells; (G) NK cells; (H) NK CD56dim cells; (I) aDC.


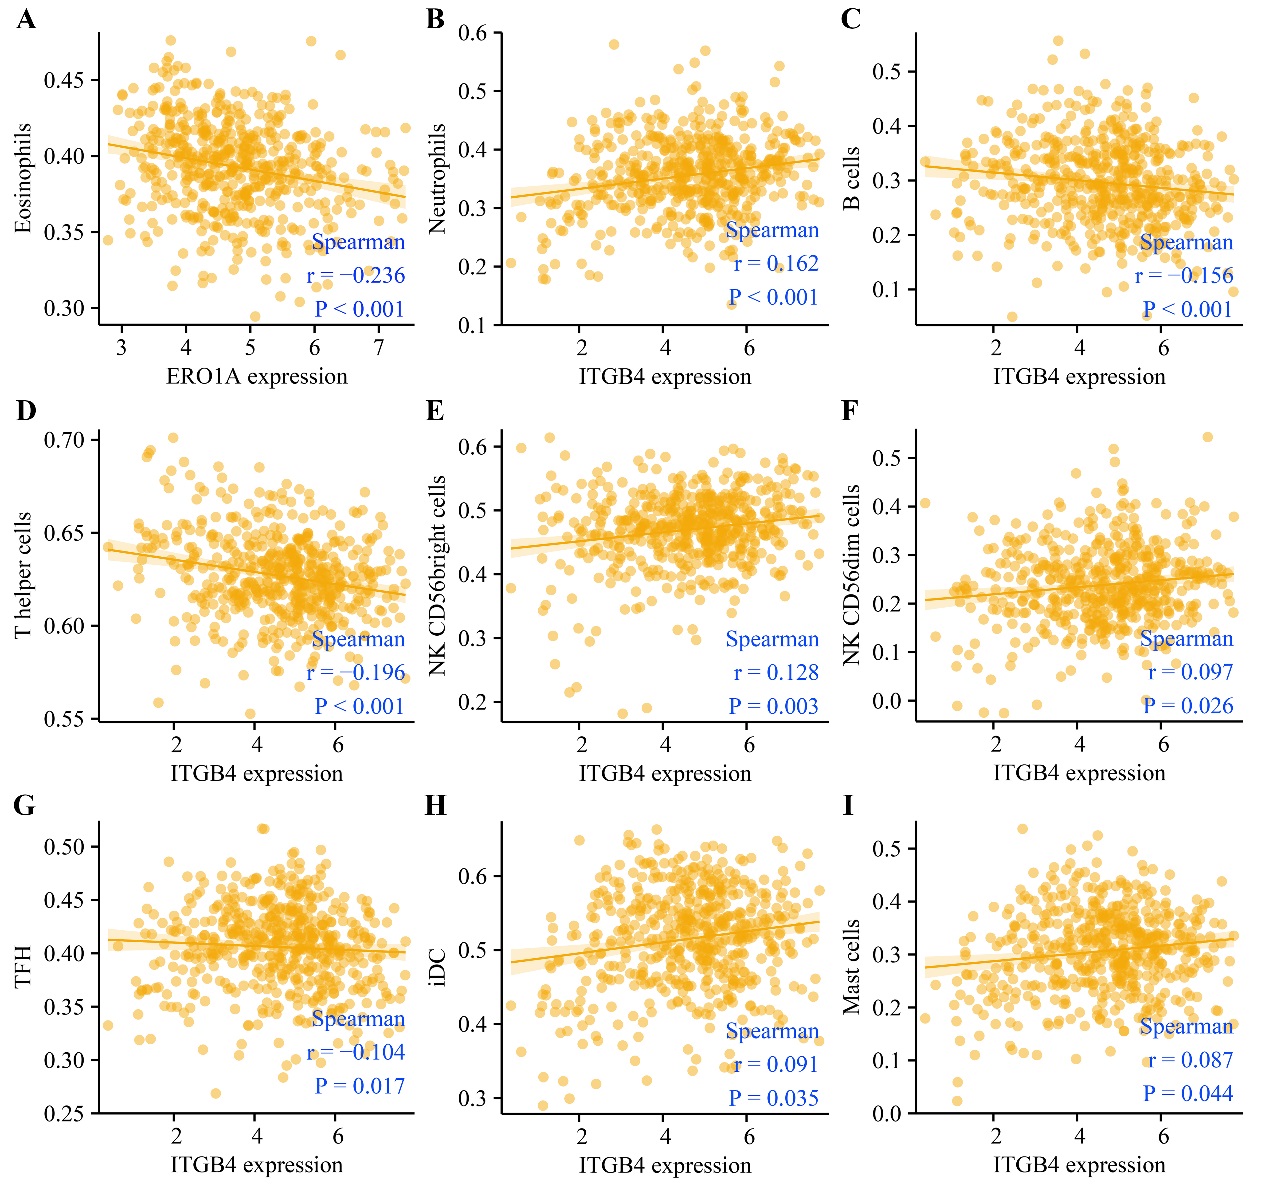


Figure S5. The expression level of *ITGB4* correlates with the levels of immune infiltrating cells. (A) Eosinophils; (B) Neutrophils; (C) B cells; (D) T helper cells; (E) NK CD56bright cells; (F) NK CD56dim cells; (G) TFH; (H) iDC; (I) Mast cells.


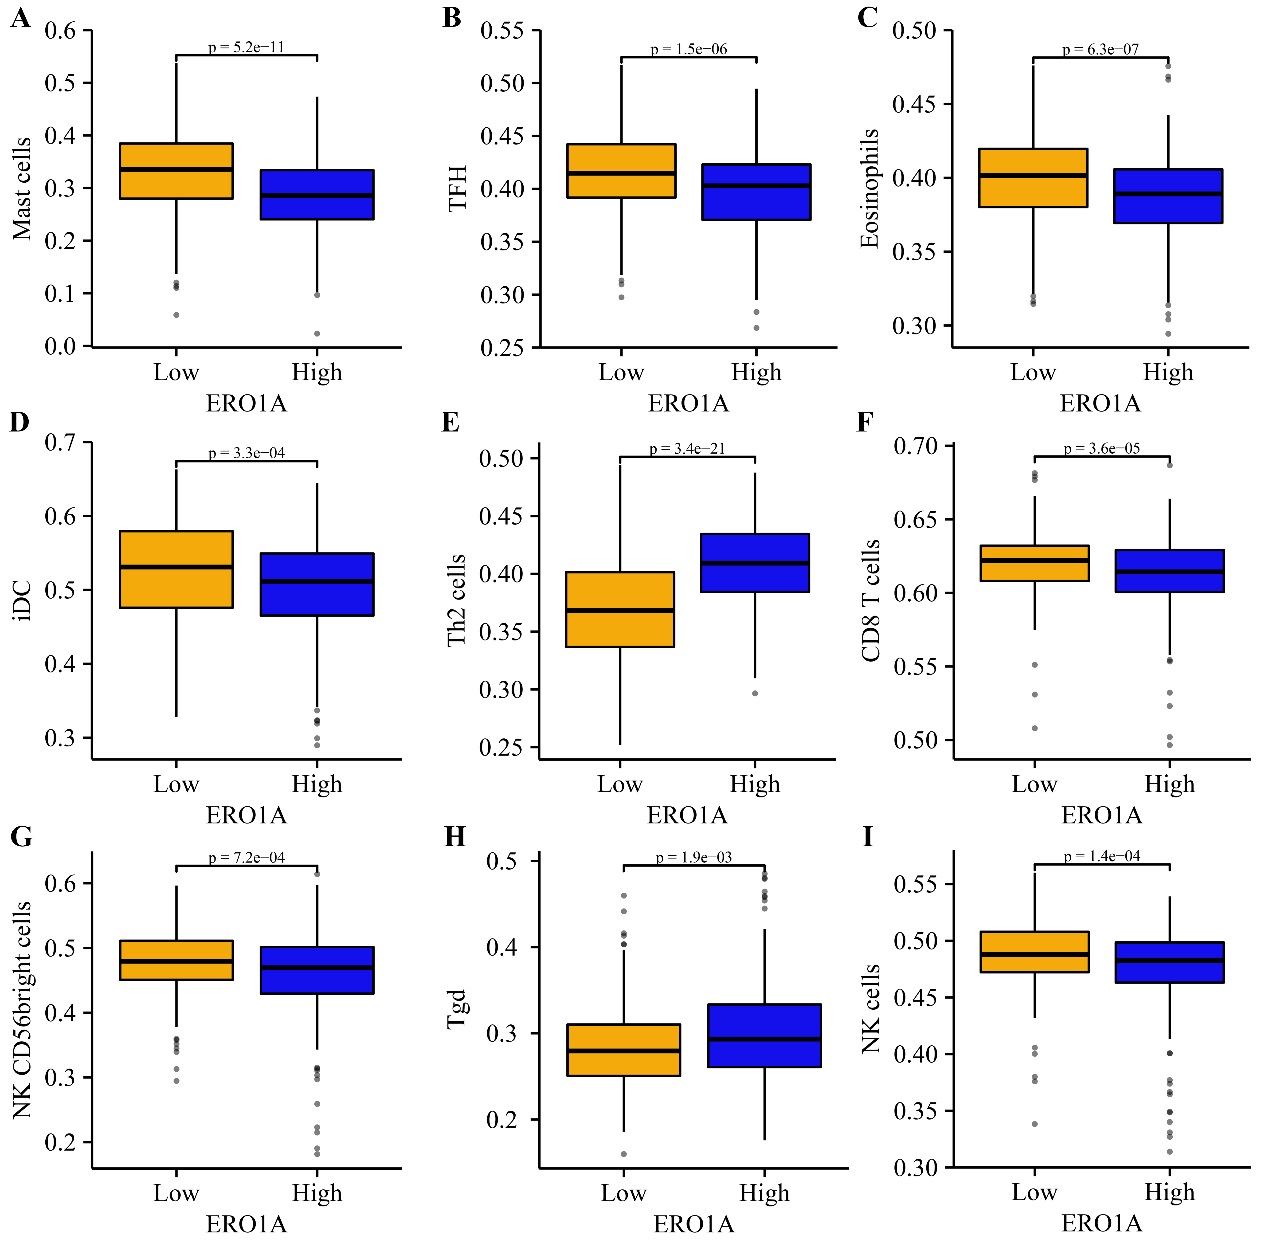


Figure S6. Abnormal expression of immune cells in the high-and low-expression groups of *ERO1A*. (A) Mast cells; (B) TFH; (C) Eosinophils; (D) iDC; (E) Th2 cells; (F) CD8 T cells; (G) NK CD56bright cells; (H) Tgd; (I) NK cells.


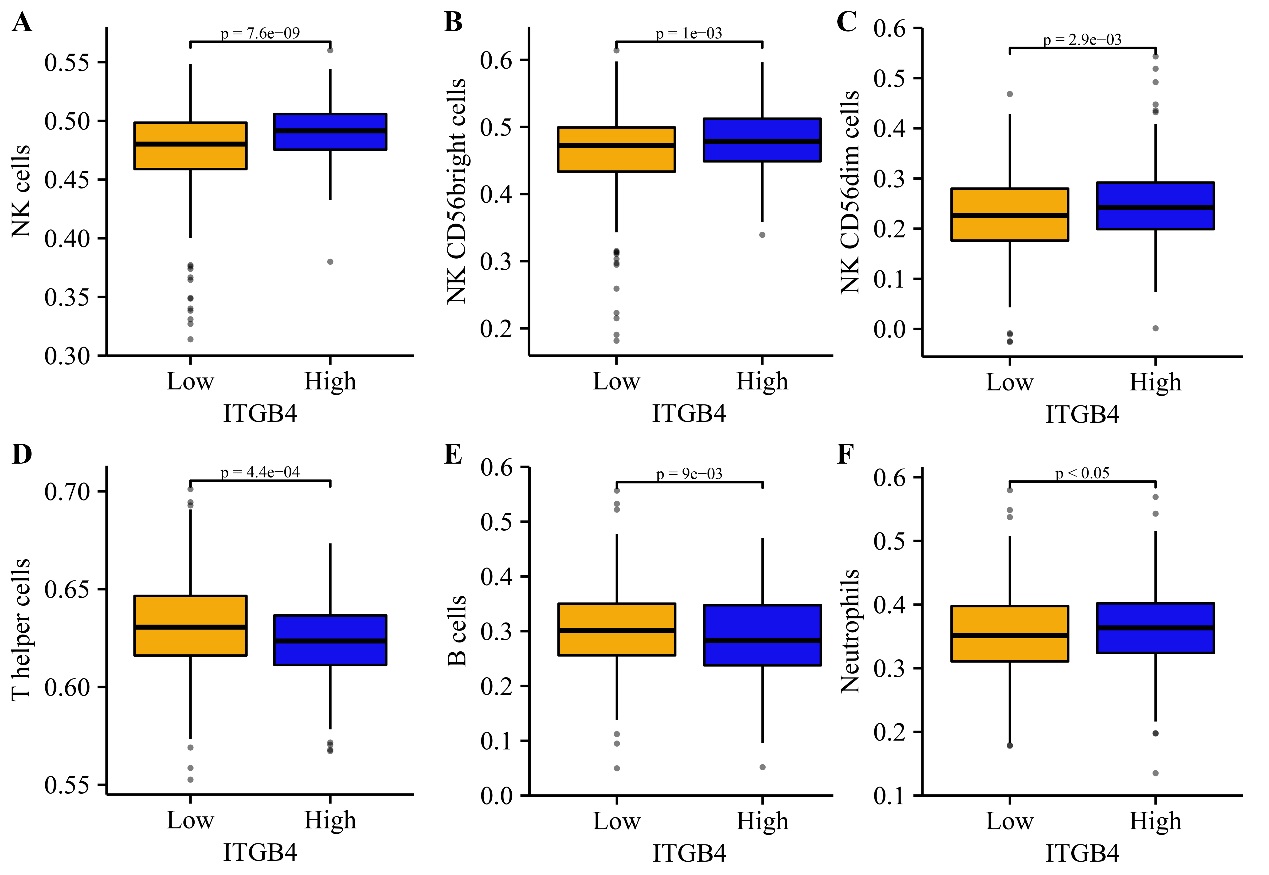
 Figure S7. Abnormal expression of immune cells in the high-and low-expression groups of *ITGB4*. (A) NK cells; (B) NK CD56bright cells; (C) NK CD56dim cells; (D) T helper cells; (E) B cells; (F) Neutrophils.

Table S1. Functions of oxidative stress-related the DEGs.

| Type | ID | Description | p.adjust |
| --- | --- | --- | --- |
| BP | GO:0006979 | response to oxidative stress | 2.1547E-118 |
| BP | GO:0034599 | cellular response to oxidative stress | 6.4559E-73 |
| BP | GO:0000302 | response to reactive oxygen species | 9.80691E-52 |
| BP | GO:0097237 | cellular response to toxic substance | 1.12595E-45 |
| BP | GO:0046677 | response to antibiotic | 2.29762E-34 |
| BP | GO:0042542 | response to hydrogen peroxide | 9.64871E-32 |
| BP | GO:0034614 | cellular response to reactive oxygen species | 2.73672E-31 |
| BP | GO:0035690 | cellular response to drug | 6.90528E-25 |
| BP | GO:0072593 | reactive oxygen species metabolic process | 7.23429E-24 |
| BP | GO:0070301 | cellular response to hydrogen peroxide | 1.37329E-22 |
| BP | GO:0098869 | cellular oxidant detoxification | 2.55268E-22 |
| BP | GO:0071236 | cellular response to antibiotic | 1.87956E-21 |
| BP | GO:1990748 | cellular detoxification | 1.98677E-21 |
| BP | GO:0098754 | detoxification | 2.57012E-21 |
| BP | GO:1902882 | regulation of response to oxidative stress | 7.42728E-20 |
| BP | GO:1900407 | regulation of cellular response to oxidative stress | 3.12253E-19 |
| BP | GO:0010038 | response to metal ion | 1.92225E-17 |
| BP | GO:0036473 | cell death in response to oxidative stress | 8.34943E-16 |
| BP | GO:0071241 | cellular response to inorganic substance | 3.98833E-15 |
| BP | GO:0042743 | hydrogen peroxide metabolic process | 8.55717E-15 |
| BP | GO:0007568 | aging | 1.14691E-14 |
| BP | GO:0070482 | response to oxygen levels | 1.42804E-14 |
| BP | GO:1903201 | regulation of oxidative stress-induced cell death | 1.55193E-14 |
| BP | GO:0071248 | cellular response to metal ion | 4.71339E-14 |
| BP | GO:0001666 | response to hypoxia | 1.30612E-12 |
| BP | GO:0036293 | response to decreased oxygen levels | 2.4498E-12 |
| BP | GO:1901031 | regulation of response to reactive oxygen species | 7.27548E-12 |
| BP | GO:0042744 | hydrogen peroxide catabolic process | 1.37994E-11 |
| BP | GO:0001101 | response to acid chemical | 3.71652E-11 |
| BP | GO:0009612 | response to mechanical stimulus | 5.27755E-10 |
| BP | GO:0046686 | response to cadmium ion | 7.78842E-10 |
| BP | GO:0051187 | cofactor catabolic process | 1.08038E-09 |
| BP | GO:0031960 | response to corticosteroid | 1.34725E-09 |
| BP | GO:2000377 | regulation of reactive oxygen species metabolic process | 1.66984E-09 |
| BP | GO:0006801 | superoxide metabolic process | 3.69857E-09 |
| BP | GO:1903202 | negative regulation of oxidative stress-induced cell death | 4.95067E-09 |
| BP | GO:1903409 | reactive oxygen species biosynthetic process | 5.00385E-09 |
| BP | GO:1900408 | negative regulation of cellular response to oxidative stress | 5.56695E-09 |
| BP | GO:0016999 | antibiotic metabolic process | 5.56695E-09 |
| BP | GO:0017001 | antibiotic catabolic process | 6.43244E-09 |
| BP | GO:1902883 | negative regulation of response to oxidative stress | 7.5E-09 |
| BP | GO:2001024 | negative regulation of response to drug | 2.82977E-08 |
| BP | GO:0055093 | response to hyperoxia | 3.00727E-08 |
| BP | GO:0009314 | response to radiation | 3.14304E-08 |
| BP | GO:0015893 | drug transport | 5.14406E-08 |
| BP | GO:0071214 | cellular response to abiotic stimulus | 5.37329E-08 |
| BP | GO:0104004 | cellular response to environmental stimulus | 5.37329E-08 |
| BP | GO:1901032 | negative regulation of response to reactive oxygen species | 5.37329E-08 |
| BP | GO:1903206 | negative regulation of hydrogen peroxide-induced cell death | 5.37329E-08 |
| BP | GO:2001039 | negative regulation of cellular response to drug | 5.37329E-08 |
| BP | GO:0009410 | response to xenobiotic stimulus | 5.52954E-08 |
| BP | GO:2001023 | regulation of response to drug | 8.09343E-08 |
| BP | GO:0070997 | neuron death | 1.09174E-07 |
| BP | GO:0071453 | cellular response to oxygen levels | 1.47268E-07 |
| BP | GO:1901214 | regulation of neuron death | 1.47427E-07 |
| BP | GO:0036296 | response to increased oxygen levels | 2.2337E-07 |
| BP | GO:0042737 | drug catabolic process | 2.30891E-07 |
| BP | GO:0071456 | cellular response to hypoxia | 2.41801E-07 |
| BP | GO:0032496 | response to lipopolysaccharide | 3.04402E-07 |
| BP | GO:0097193 | intrinsic apoptotic signaling pathway | 3.12888E-07 |
| BP | GO:1903205 | regulation of hydrogen peroxide-induced cell death | 3.4272E-07 |
| BP | GO:0051384 | response to glucocorticoid | 3.4272E-07 |
| BP | GO:0071466 | cellular response to xenobiotic stimulus | 3.71541E-07 |
| BP | GO:0036294 | cellular response to decreased oxygen levels | 4.01946E-07 |
| BP | GO:0002237 | response to molecule of bacterial origin | 4.91411E-07 |
| BP | GO:0043434 | response to peptide hormone | 5.01939E-07 |
| BP | GO:0015669 | gas transport | 5.40046E-07 |
| BP | GO:2001038 | regulation of cellular response to drug | 6.39821E-07 |
| BP | GO:0036474 | cell death in response to hydrogen peroxide | 7.88228E-07 |
| BP | GO:0045454 | cell redox homeostasis | 1.05722E-06 |
| BP | GO:0042554 | superoxide anion generation | 1.17137E-06 |
| BP | GO:0032355 | response to estradiol | 1.31506E-06 |
| BP | GO:0071229 | cellular response to acid chemical | 1.91501E-06 |
| BP | GO:0048545 | response to steroid hormone | 2.34888E-06 |
| BP | GO:0044843 | cell cycle G1/S phase transition | 2.72585E-06 |
| BP | GO:0032963 | collagen metabolic process | 3.15891E-06 |
| BP | GO:0008631 | intrinsic apoptotic signaling pathway in response to oxidative stress | 3.96106E-06 |
| BP | GO:0071478 | cellular response to radiation | 5.46203E-06 |
| BP | GO:0015671 | oxygen transport | 6.12956E-06 |
| BP | GO:0097327 | response to antineoplastic agent | 7.25518E-06 |
| BP | GO:0000082 | G1/S transition of mitotic cell cycle | 7.41065E-06 |
| BP | GO:0051591 | response to cAMP | 7.74434E-06 |
| BP | GO:0043062 | extracellular structure organization | 7.79841E-06 |
| BP | GO:0006575 | cellular modified amino acid metabolic process | 9.32542E-06 |
| BP | GO:0031100 | animal organ regeneration | 1.00711E-05 |
| BP | GO:1901989 | positive regulation of cell cycle phase transition | 1.58692E-05 |
| BP | GO:0071277 | cellular response to calcium ion | 2.6817E-05 |
| BP | GO:2000045 | regulation of G1/S transition of mitotic cell cycle | 2.72154E-05 |
| BP | GO:0009416 | response to light stimulus | 2.81639E-05 |
| BP | GO:0071276 | cellular response to cadmium ion | 2.99741E-05 |
| BP | GO:0014074 | response to purine-containing compound | 2.99741E-05 |
| BP | GO:0097305 | response to alcohol | 3.91605E-05 |
| BP | GO:1901654 | response to ketone | 4.13035E-05 |
| BP | GO:1901992 | positive regulation of mitotic cell cycle phase transition | 5.04123E-05 |
| BP | GO:0015701 | bicarbonate transport | 6.19306E-05 |
| BP | GO:0042063 | gliogenesis | 6.19306E-05 |
| BP | GO:1902806 | regulation of cell cycle G1/S phase transition | 6.19306E-05 |
| BP | GO:0045787 | positive regulation of cell cycle | 6.24598E-05 |
| BP | GO:0071496 | cellular response to external stimulus | 6.26989E-05 |
| BP | GO:0031667 | response to nutrient levels | 6.6065E-05 |
| BP | GO:0048511 | rhythmic process | 7.17122E-05 |
| BP | GO:0090068 | positive regulation of cell cycle process | 7.94057E-05 |
| BP | GO:1903203 | regulation of oxidative stress-induced neuron death | 9.46816E-05 |
| BP | GO:0046683 | response to organophosphorus | 9.46816E-05 |
| BP | GO:2001233 | regulation of apoptotic signaling pathway | 9.86007E-05 |
| BP | GO:1903426 | regulation of reactive oxygen species biosynthetic process | 9.87471E-05 |
| BP | GO:2000379 | positive regulation of reactive oxygen species metabolic process | 0.00010537 |
| BP | GO:0036475 | neuron death in response to oxidative stress | 0.000109726 |
| BP | GO:1902175 | regulation of oxidative stress-induced intrinsic apoptotic  signaling pathway | 0.000109726 |
| BP | GO:0018958 | phenol-containing compound metabolic process | 0.000110311 |
| BP | GO:0007584 | response to nutrient | 0.000118479 |
| BP | GO:0044706 | multi-multicellular organism process | 0.00013382 |
| BP | GO:0030198 | extracellular matrix organization | 0.00014248 |
| BP | GO:0002931 | response to ischemia | 0.000148639 |
| BP | GO:0006809 | nitric oxide biosynthetic process | 0.000153612 |
| BP | GO:1901987 | regulation of cell cycle phase transition | 0.000153612 |
| BP | GO:0022900 | electron transport chain | 0.000172126 |
| BP | GO:0048871 | multicellular organismal homeostasis | 0.000172126 |
| BP | GO:0032964 | collagen biosynthetic process | 0.000201322 |
| BP | GO:1901653 | cellular response to peptide | 0.000221779 |
| BP | GO:0034644 | cellular response to UV | 0.000221779 |
| BP | GO:0046209 | nitric oxide metabolic process | 0.000221779 |
| BP | GO:0002446 | neutrophil mediated immunity | 0.000236042 |
| BP | GO:0007569 | cell aging | 0.000237579 |
| BP | GO:0051402 | neuron apoptotic process | 0.000241798 |
| BP | GO:1901990 | regulation of mitotic cell cycle phase transition | 0.000241798 |
| BP | GO:0006749 | glutathione metabolic process | 0.000261092 |
| BP | GO:2001057 | reactive nitrogen species metabolic process | 0.000268497 |
| BP | GO:0031099 | regeneration | 0.000272284 |
| BP | GO:0070542 | response to fatty acid | 0.000285699 |
| BP | GO:0006536 | glutamate metabolic process | 0.000299529 |
| BP | GO:0008637 | apoptotic mitochondrial changes | 0.000361869 |
| BP | GO:0014013 | regulation of gliogenesis | 0.000361869 |
| BP | GO:0045931 | positive regulation of mitotic cell cycle | 0.000363154 |
| BP | GO:2000134 | negative regulation of G1/S transition of mitotic cell cycle | 0.00037809 |
| BP | GO:0070555 | response to interleukin-1 | 0.000380568 |
| BP | GO:2001242 | regulation of intrinsic apoptotic signaling pathway | 0.000391071 |
| BP | GO:1901215 | negative regulation of neuron death | 0.000391071 |
| BP | GO:0043523 | regulation of neuron apoptotic process | 0.000421824 |
| BP | GO:0030099 | myeloid cell differentiation | 0.00045951 |
| BP | GO:1901216 | positive regulation of neuron death | 0.00047335 |
| BP | GO:1902807 | negative regulation of cell cycle G1/S phase transition | 0.0005055 |
| BP | GO:2000378 | negative regulation of reactive oxygen species metabolic process | 0.0005055 |
| BP | GO:0014823 | response to activity | 0.000549078 |
| BP | GO:0015711 | organic anion transport | 0.000551723 |
| BP | GO:1901988 | negative regulation of cell cycle phase transition | 0.000583046 |
| BP | GO:0043312 | neutrophil degranulation | 0.000583453 |
| BP | GO:0045428 | regulation of nitric oxide biosynthetic process | 0.000583453 |
| BP | GO:0051767 | nitric-oxide synthase biosynthetic process | 0.000588374 |
| BP | GO:0051769 | regulation of nitric-oxide synthase biosynthetic process | 0.000588374 |
| BP | GO:0071548 | response to dexamethasone | 0.000589071 |
| BP | GO:0002283 | neutrophil activation involved in immune response | 0.000607364 |
| BP | GO:1901605 | alpha-amino acid metabolic process | 0.000618247 |
| BP | GO:0051090 | regulation of DNA-binding transcription factor activity | 0.000633557 |
| BP | GO:0048661 | positive regulation of smooth muscle cell proliferation | 0.000687548 |
| BP | GO:0051900 | regulation of mitochondrial depolarization | 0.000694117 |
| BP | GO:0042698 | ovulation cycle | 0.00071019 |
| BP | GO:0000079 | regulation of cyclin-dependent protein serine/threonine  kinase activity | 0.000718935 |
| BP | GO:0042119 | neutrophil activation | 0.000733375 |
| BP | GO:0009411 | response to UV | 0.000763146 |
| BP | GO:0045429 | positive regulation of nitric oxide biosynthetic process | 0.00079134 |
| BP | GO:0051881 | regulation of mitochondrial membrane potential | 0.000865043 |
| BP | GO:0032965 | regulation of collagen biosynthetic process | 0.000865043 |
| BP | GO:0046688 | response to copper ion | 0.000865043 |
| BP | GO:1904407 | positive regulation of nitric oxide metabolic process | 0.000865043 |
| BP | GO:0042136 | neurotransmitter biosynthetic process | 0.000871838 |
| BP | GO:1904029 | regulation of cyclin-dependent protein kinase activity | 0.000871838 |
| BP | GO:0043405 | regulation of MAP kinase activity | 0.000902076 |
| BP | GO:0072401 | signal transduction involved in DNA integrity checkpoint | 0.000904433 |
| BP | GO:0072422 | signal transduction involved in DNA damage checkpoint | 0.000904433 |
| BP | GO:0043502 | regulation of muscle adaptation | 0.000904433 |
| BP | GO:0051882 | mitochondrial depolarization | 0.000918839 |
| BP | GO:0009064 | glutamine family amino acid metabolic process | 0.000955321 |
| BP | GO:0072395 | signal transduction involved in cell cycle checkpoint | 0.000955321 |
| BP | GO:0051592 | response to calcium ion | 0.000986043 |
| BP | GO:0007565 | female pregnancy | 0.001007753 |
| BP | GO:0003012 | muscle system process | 0.001224383 |
| BP | GO:0043200 | response to amino acid | 0.00123184 |
| BP | GO:0019430 | removal of superoxide radicals | 0.001244245 |
| BP | GO:0071260 | cellular response to mechanical stimulus | 0.001328873 |
| BP | GO:1901991 | negative regulation of mitotic cell cycle phase transition | 0.001328873 |
| BP | GO:0010712 | regulation of collagen metabolic process | 0.001328873 |
| BP | GO:0001505 | regulation of neurotransmitter levels | 0.001328873 |
| BP | GO:0071560 | cellular response to transforming growth factor beta stimulus | 0.001355311 |
| BP | GO:0022617 | extracellular matrix disassembly | 0.001396066 |
| BP | GO:0042044 | fluid transport | 0.001398021 |
| BP | GO:0043567 | regulation of insulin-like growth factor receptor  signaling pathway | 0.001398021 |
| BP | GO:0001558 | regulation of cell growth | 0.00146647 |
| BP | GO:0048146 | positive regulation of fibroblast proliferation | 0.001555066 |
| BP | GO:0071559 | response to transforming growth factor beta | 0.001571217 |
| BP | GO:0010971 | positive regulation of G2/M transition of mitotic cell cycle | 0.001571217 |
| BP | GO:0060259 | regulation of feeding behavior | 0.001571217 |
| BP | GO:0071450 | cellular response to oxygen radical | 0.001571217 |
| BP | GO:0071451 | cellular response to superoxide | 0.001571217 |
| BP | GO:0018108 | peptidyl-tyrosine phosphorylation | 0.001583195 |
| BP | GO:0018212 | peptidyl-tyrosine modification | 0.001699535 |
| BP | GO:0043406 | positive regulation of MAP kinase activity | 0.001699535 |
| BP | GO:0002718 | regulation of cytokine production involved in immune  response | 0.001714534 |
| BP | GO:0034698 | response to gonadotropin | 0.00177492 |
| BP | GO:0043500 | muscle adaptation | 0.001780967 |
| BP | GO:0072537 | fibroblast activation | 0.00184818 |
| BP | GO:1904645 | response to amyloid-beta | 0.001917986 |
| BP | GO:0000303 | response to superoxide | 0.001994839 |
| BP | GO:0071280 | cellular response to copper ion | 0.001994839 |
| BP | GO:0045471 | response to ethanol | 0.002023801 |
| BP | GO:0050673 | epithelial cell proliferation | 0.002044307 |
| BP | GO:0010332 | response to gamma radiation | 0.00222083 |
| BP | GO:0000305 | response to oxygen radical | 0.00222083 |
| BP | GO:0061082 | myeloid leukocyte cytokine production | 0.00222083 |
| BP | GO:1902751 | positive regulation of cell cycle G2/M phase transition | 0.00222083 |
| BP | GO:0010001 | glial cell differentiation | 0.002225432 |
| BP | GO:0030900 | forebrain development | 0.00229489 |
| BP | GO:1904668 | positive regulation of ubiquitin protein ligase activity | 0.002299711 |
| BP | GO:2000121 | regulation of removal of superoxide radicals | 0.002299711 |
| BP | GO:0071398 | cellular response to fatty acid | 0.002325296 |
| BP | GO:1903428 | positive regulation of reactive oxygen species biosynthetic  process | 0.002325296 |
| BP | GO:0071482 | cellular response to light stimulus | 0.002327732 |
| BP | GO:0051899 | membrane depolarization | 0.002428499 |
| BP | GO:0043457 | regulation of cellular respiration | 0.002428499 |
| BP | GO:0045444 | fat cell differentiation | 0.002532234 |
| BP | GO:1901655 | cellular response to ketone | 0.002700569 |
| BP | GO:0046685 | response to arsenic-containing substance | 0.002707194 |
| BP | GO:0051385 | response to mineralocorticoid | 0.002707194 |
| BP | GO:0042770 | signal transduction in response to DNA damage | 0.002726169 |
| BP | GO:0071902 | positive regulation of protein serine/threonine kinase activity | 0.002809259 |
| BP | GO:0090399 | replicative senescence | 0.002812749 |
| BP | GO:0048771 | tissue remodeling | 0.002866966 |
| BP | GO:0010639 | negative regulation of organelle organization | 0.002979585 |
| BP | GO:0010039 | response to iron ion | 0.002979585 |
| BP | GO:0090303 | positive regulation of wound healing | 0.002988021 |
| BP | GO:0045930 | negative regulation of mitotic cell cycle | 0.002988021 |
| BP | GO:0009743 | response to carbohydrate | 0.002988021 |
| BP | GO:2001234 | negative regulation of apoptotic signaling pathway | 0.002988021 |
| BP | GO:0010565 | regulation of cellular ketone metabolic process | 0.002988021 |
| BP | GO:0051147 | regulation of muscle cell differentiation | 0.002988021 |
| BP | GO:0010660 | regulation of muscle cell apoptotic process | 0.003010307 |
| BP | GO:0021700 | developmental maturation | 0.003091755 |
| BP | GO:0070265 | necrotic cell death | 0.003149044 |
| BP | GO:2001243 | negative regulation of intrinsic apoptotic signaling pathway | 0.003327163 |
| BP | GO:0014854 | response to inactivity | 0.003349452 |
| BP | GO:0043648 | dicarboxylic acid metabolic process | 0.003487371 |
| BP | GO:0010259 | multicellular organism aging | 0.003559134 |
| BP | GO:0007050 | cell cycle arrest | 0.003610968 |
| BP | GO:0010657 | muscle cell apoptotic process | 0.003638218 |
| BP | GO:0033002 | muscle cell proliferation | 0.003809193 |
| BP | GO:0007631 | feeding behavior | 0.003809193 |
| BP | GO:0051146 | striated muscle cell differentiation | 0.003809584 |
| BP | GO:0035296 | regulation of tube diameter | 0.003816473 |
| BP | GO:0050880 | regulation of blood vessel size | 0.003816473 |
| BP | GO:0097746 | regulation of blood vessel diameter | 0.003816473 |
| BP | GO:0002367 | cytokine production involved in immune response | 0.003869782 |
| BP | GO:0035150 | regulation of tube size | 0.003869782 |
| BP | GO:0071322 | cellular response to carbohydrate stimulus | 0.003869782 |
| BP | GO:0014874 | response to stimulus involved in regulation of  muscle adaptation | 0.003869782 |
| BP | GO:0019471 | 4-hydroxyproline metabolic process | 0.003869782 |
| BP | GO:0042762 | regulation of sulfur metabolic process | 0.003869782 |
| BP | GO:0045073 | regulation of chemokine biosynthetic process | 0.003869782 |
| BP | GO:0051770 | positive regulation of nitric-oxide synthase biosynthetic process | 0.003869782 |
| BP | GO:0042108 | positive regulation of cytokine biosynthetic process | 0.004169995 |
| BP | GO:0002262 | myeloid cell homeostasis | 0.004325258 |
| BP | GO:0010212 | response to ionizing radiation | 0.004325258 |
| BP | GO:0048872 | homeostasis of number of cells | 0.004401548 |
| BP | GO:0071230 | cellular response to amino acid stimulus | 0.004401548 |
| BP | GO:0014065 | phosphatidylinositol 3-kinase signaling | 0.004439132 |
| BP | GO:0061041 | regulation of wound healing | 0.004439132 |
| BP | GO:0010939 | regulation of necrotic cell death | 0.00443948 |
| BP | GO:0016572 | histone phosphorylation | 0.00443948 |
| BP | GO:0048009 | insulin-like growth factor receptor signaling pathway | 0.00443948 |
| BP | GO:0001763 | morphogenesis of a branching structure | 0.004455995 |
| BP | GO:0016049 | cell growth | 0.004455995 |
| BP | GO:0042033 | chemokine biosynthetic process | 0.004455995 |
| BP | GO:0044849 | estrous cycle | 0.004455995 |
| BP | GO:0050755 | chemokine metabolic process | 0.004455995 |
| BP | GO:0071732 | cellular response to nitric oxide | 0.004455995 |
| BP | GO:0010948 | negative regulation of cell cycle process | 0.004475412 |
| BP | GO:1901342 | regulation of vasculature development | 0.004482924 |
| BP | GO:0050727 | regulation of inflammatory response | 0.004482924 |
| BP | GO:0071774 | response to fibroblast growth factor | 0.004588245 |
| BP | GO:0051341 | regulation of oxidoreductase activity | 0.004588245 |
| BP | GO:0060395 | SMAD protein signal transduction | 0.004733407 |
| BP | GO:0021537 | telencephalon development | 0.004761229 |
| BP | GO:0006520 | cellular amino acid metabolic process | 0.004885387 |
| BP | GO:0032675 | regulation of interleukin-6 production | 0.004885387 |
| BP | GO:0071479 | cellular response to ionizing radiation | 0.004985253 |
| BP | GO:0042133 | neurotransmitter metabolic process | 0.005029308 |
| BP | GO:0050729 | positive regulation of inflammatory response | 0.005029308 |
| BP | GO:0006750 | glutathione biosynthetic process | 0.005097201 |
| BP | GO:0050665 | hydrogen peroxide biosynthetic process | 0.005097201 |
| BP | GO:1903209 | positive regulation of oxidative stress-induced cell death | 0.005097201 |
| BP | GO:0002532 | production of molecular mediator involved in  inflammatory response | 0.005209848 |
| BP | GO:0002573 | myeloid leukocyte differentiation | 0.005404082 |
| BP | GO:0006790 | sulfur compound metabolic process | 0.005427122 |
| BP | GO:0150077 | regulation of neuroinflammatory response | 0.005458894 |
| BP | GO:0031098 | stress-activated protein kinase signaling cascade | 0.005668794 |
| BP | GO:0050679 | positive regulation of epithelial cell proliferation | 0.005687492 |
| BP | GO:1900182 | positive regulation of protein localization to nucleus | 0.005775431 |
| BP | GO:1903036 | positive regulation of response to wounding | 0.005775431 |
| BP | GO:0034284 | response to monosaccharide | 0.005813844 |
| BP | GO:0007252 | I-kappaB phosphorylation | 0.005854694 |
| BP | GO:0071371 | cellular response to gonadotropin stimulus | 0.005854694 |
| BP | GO:0051091 | positive regulation of DNA-binding transcription factor activity | 0.005901343 |
| BP | GO:0007623 | circadian rhythm | 0.005922782 |
| BP | GO:0150076 | neuroinflammatory response | 0.00602314 |
| BP | GO:0000096 | sulfur amino acid metabolic process | 0.006325354 |
| BP | GO:0071375 | cellular response to peptide hormone stimulus | 0.006328999 |
| BP | GO:0032635 | interleukin-6 production | 0.006381965 |
| BP | GO:1900180 | regulation of protein localization to nucleus | 0.006419611 |
| BP | GO:0032103 | positive regulation of response to external stimulus | 0.006524075 |
| BP | GO:0044839 | cell cycle G2/M phase transition | 0.006524075 |
| BP | GO:0051153 | regulation of striated muscle cell differentiation | 0.006524075 |
| BP | GO:0006534 | cysteine metabolic process | 0.006524075 |
| BP | GO:0019184 | nonribosomal peptide biosynthetic process | 0.006524075 |
| BP | GO:0060252 | positive regulation of glial cell proliferation | 0.006524075 |
| BP | GO:0061081 | positive regulation of myeloid leukocyte cytokine  production involved in immune response | 0.006524075 |
| BP | GO:0071731 | response to nitric oxide | 0.006524075 |
| BP | GO:1900409 | positive regulation of cellular response to oxidative stress | 0.006524075 |
| BP | GO:1902170 | cellular response to reactive nitrogen species | 0.006524075 |
| BP | GO:1903829 | positive regulation of cellular protein localization | 0.006524075 |
| BP | GO:0046189 | phenol-containing compound biosynthetic process | 0.006585972 |
| BP | GO:0042692 | muscle cell differentiation | 0.006592492 |
| BP | GO:0031668 | cellular response to extracellular stimulus | 0.006693234 |
| BP | GO:0051188 | cofactor biosynthetic process | 0.006756967 |
| BP | GO:0006836 | neurotransmitter transport | 0.00683148 |
| BP | GO:0007093 | mitotic cell cycle checkpoint | 0.006975299 |
| BP | GO:0000075 | cell cycle checkpoint | 0.007055978 |
| BP | GO:1901617 | organic hydroxy compound biosynthetic process | 0.007136515 |
| BP | GO:0032868 | response to insulin | 0.007304107 |
| BP | GO:0033194 | response to hydroperoxide | 0.007363374 |
| BP | GO:1903204 | negative regulation of oxidative stress-induced neuron death | 0.007363374 |
| BP | GO:0031648 | protein destabilization | 0.007550142 |
| BP | GO:0048708 | astrocyte differentiation | 0.007844261 |
| BP | GO:0048660 | regulation of smooth muscle cell proliferation | 0.007844261 |
| BP | GO:0030574 | collagen catabolic process | 0.008122993 |
| BP | GO:0006855 | drug transmembrane transport | 0.008176665 |
| BP | GO:0032642 | regulation of chemokine production | 0.008176665 |
| BP | GO:1905954 | positive regulation of lipid localization | 0.008176665 |
| BP | GO:0010634 | positive regulation of epithelial cell migration | 0.008235371 |
| BP | GO:0048659 | smooth muscle cell proliferation | 0.008235371 |
| BP | GO:0046717 | acid secretion | 0.008235371 |
| BP | GO:0017000 | antibiotic biosynthetic process | 0.008235371 |
| BP | GO:1902884 | positive regulation of response to oxidative stress | 0.008235371 |
| BP | GO:0032874 | positive regulation of stress-activated MAPK cascade | 0.008446762 |
| BP | GO:0048145 | regulation of fibroblast proliferation | 0.008463906 |
| BP | GO:0006805 | xenobiotic metabolic process | 0.008471013 |
| BP | GO:0007528 | neuromuscular junction development | 0.008471013 |
| BP | GO:0090199 | regulation of release of cytochrome c from mitochondria | 0.008471013 |
| BP | GO:0001659 | temperature homeostasis | 0.008564178 |
| BP | GO:0003018 | vascular process in circulatory system | 0.008564178 |
| BP | GO:0070304 | positive regulation of stress-activated protein kinase  signaling cascade | 0.008564178 |
| BP | GO:0043154 | negative regulation of cysteine-type endopeptidase  activity involved in apoptotic process | 0.008733264 |
| BP | GO:0048144 | fibroblast proliferation | 0.008733264 |
| BP | GO:0003254 | regulation of membrane depolarization | 0.008966827 |
| BP | GO:0035094 | response to nicotine | 0.008966827 |
| BP | GO:0043620 | regulation of DNA-templated transcription in response  to stress | 0.008966827 |
| BP | GO:0006925 | inflammatory cell apoptotic process | 0.009050186 |
| BP | GO:0044321 | response to leptin | 0.009050186 |
| BP | GO:1904666 | regulation of ubiquitin protein ligase activity | 0.009050186 |
| BP | GO:0051403 | stress-activated MAPK cascade | 0.009506753 |
| BP | GO:0010718 | positive regulation of epithelial to mesenchymal transition | 0.009506753 |
| BP | GO:0042398 | cellular modified amino acid biosynthetic process | 0.009506753 |
| BP | GO:0007517 | muscle organ development | 0.009778461 |
| BP | GO:0071347 | cellular response to interleukin-1 | 0.010051062 |
| BP | GO:1903034 | regulation of response to wounding | 0.010051062 |
| BP | GO:0045599 | negative regulation of fat cell differentiation | 0.010133759 |
| BP | GO:0051260 | protein homooligomerization | 0.010473461 |
| BP | GO:0048015 | phosphatidylinositol-mediated signaling | 0.010634366 |
| BP | GO:0032602 | chemokine production | 0.010844812 |
| BP | GO:0061138 | morphogenesis of a branching epithelium | 0.010920383 |
| BP | GO:0071333 | cellular response to glucose stimulus | 0.010932229 |
| BP | GO:0032872 | regulation of stress-activated MAPK cascade | 0.011279964 |
| BP | GO:0046849 | bone remodeling | 0.011279964 |
| BP | GO:0048017 | inositol lipid-mediated signaling | 0.011509225 |
| BP | GO:0001889 | liver development | 0.011649675 |
| BP | GO:0071331 | cellular response to hexose stimulus | 0.011649675 |
| BP | GO:0070302 | regulation of stress-activated protein kinase  signaling cascade | 0.01176173 |
| BP | GO:0071326 | cellular response to monosaccharide stimulus | 0.012036481 |
| BP | GO:0002720 | positive regulation of cytokine production involved in  immune response | 0.012101672 |
| BP | GO:0051353 | positive regulation of oxidoreductase activity | 0.012101672 |
| BP | GO:2000117 | negative regulation of cysteine-type endopeptidase activity | 0.012184161 |
| BP | GO:0070372 | regulation of ERK1 and ERK2 cascade | 0.012508269 |
| BP | GO:0007589 | body fluid secretion | 0.012698435 |
| BP | GO:0061008 | hepaticobiliary system development | 0.012698435 |
| BP | GO:0010823 | negative regulation of mitochondrion organization | 0.012698435 |
| BP | GO:0043030 | regulation of macrophage activation | 0.012698435 |
| BP | GO:0043113 | receptor clustering | 0.012698435 |
| BP | GO:0009266 | response to temperature stimulus | 0.012698435 |
| BP | GO:0051896 | regulation of protein kinase B signaling | 0.012999696 |
| BP | GO:0002700 | regulation of production of molecular mediator of  immune response | 0.013046529 |
| BP | GO:0006977 | DNA damage response, signal transduction by p53  class mediator resulting in cell cycle arrest | 0.013474162 |
| BP | GO:0032967 | positive regulation of collagen biosynthetic process | 0.013598446 |
| BP | GO:1903579 | negative regulation of ATP metabolic process | 0.013598446 |
| BP | GO:0000086 | G2/M transition of mitotic cell cycle | 0.01386504 |
| BP | GO:0042391 | regulation of membrane potential | 0.014068149 |
| BP | GO:0048732 | gland development | 0.014068149 |
| BP | GO:0042180 | cellular ketone metabolic process | 0.014068149 |
| BP | GO:0032755 | positive regulation of interleukin-6 production | 0.014068149 |
| BP | GO:0072431 | signal transduction involved in mitotic G1 DNA  damage checkpoint | 0.014068149 |
| BP | GO:1902400 | intracellular signal transduction involved in G1 DNA  damage checkpoint | 0.014068149 |
| BP | GO:0045333 | cellular respiration | 0.014114011 |
| BP | GO:1900542 | regulation of purine nucleotide metabolic process | 0.014114011 |
| BP | GO:0030316 | osteoclast differentiation | 0.01455258 |
| BP | GO:0044344 | cellular response to fibroblast growth factor stimulus | 0.01455258 |
| BP | GO:0071383 | cellular response to steroid hormone stimulus | 0.01455258 |
| BP | GO:0010714 | positive regulation of collagen metabolic process | 0.014711669 |
| BP | GO:0032722 | positive regulation of chemokine production | 0.014712914 |
| BP | GO:0071385 | cellular response to glucocorticoid stimulus | 0.014712914 |
| BP | GO:0000077 | DNA damage checkpoint | 0.015427579 |
| BP | GO:0009749 | response to glucose | 0.015448564 |
| BP | GO:0001836 | release of cytochrome c from mitochondria | 0.015448564 |
| BP | GO:0072413 | signal transduction involved in mitotic cell  cycle checkpoint | 0.015448564 |
| BP | GO:1902402 | signal transduction involved in mitotic DNA  damage checkpoint | 0.015448564 |
| BP | GO:1902403 | signal transduction involved in mitotic DNA  integrity checkpoint | 0.015448564 |
| BP | GO:0006140 | regulation of nucleotide metabolic process | 0.015666779 |
| BP | GO:2000241 | regulation of reproductive process | 0.015666779 |
| BP | GO:2001251 | negative regulation of chromosome organization | 0.015666779 |
| BP | GO:0007626 | locomotory behavior | 0.015670893 |
| BP | GO:0048520 | positive regulation of behavior | 0.0158221 |
| BP | GO:1900543 | negative regulation of purine nucleotide metabolic process | 0.0158221 |
| BP | GO:0050678 | regulation of epithelial cell proliferation | 0.0158221 |
| BP | GO:0055024 | regulation of cardiac muscle tissue development | 0.015919718 |
| BP | GO:0043524 | negative regulation of neuron apoptotic process | 0.015948682 |
| BP | GO:0061351 | neural precursor cell proliferation | 0.015948682 |
| BP | GO:1902808 | positive regulation of cell cycle G1/S phase transition | 0.016013279 |
| BP | GO:0070371 | ERK1 and ERK2 cascade | 0.016352899 |
| BP | GO:0032370 | positive regulation of lipid transport | 0.016902031 |
| BP | GO:0071384 | cellular response to corticosteroid stimulus | 0.016902031 |
| BP | GO:0006631 | fatty acid metabolic process | 0.016929769 |
| BP | GO:0045765 | regulation of angiogenesis | 0.016929769 |
| BP | GO:0009746 | response to hexose | 0.016929769 |
| BP | GO:0090257 | regulation of muscle system process | 0.016929769 |
| BP | GO:0000083 | regulation of transcription involved in G1/S  transition of mitotic cell cycle | 0.016929769 |
| BP | GO:0015949 | nucleobase-containing small molecule interconversion | 0.016929769 |
| BP | GO:0045980 | negative regulation of nucleotide metabolic process | 0.016929769 |
| BP | GO:0048754 | branching morphogenesis of an epithelial tube | 0.017172607 |
| BP | GO:0018209 | peptidyl-serine modification | 0.017719799 |
| BP | GO:0034504 | protein localization to nucleus | 0.018026326 |
| BP | GO:0071887 | leukocyte apoptotic process | 0.018146279 |
| BP | GO:0000187 | activation of MAPK activity | 0.018146279 |
| BP | GO:0001678 | cellular glucose homeostasis | 0.018146279 |
| BP | GO:0042759 | long-chain fatty acid biosynthetic process | 0.018180843 |
| BP | GO:0071480 | cellular response to gamma radiation | 0.018180843 |
| BP | GO:0071549 | cellular response to dexamethasone stimulus | 0.018180843 |
| BP | GO:0090200 | positive regulation of release of cytochrome c  from mitochondria | 0.018180843 |
| BP | GO:0097421 | liver regeneration | 0.018180843 |
| BP | GO:0031571 | mitotic G1 DNA damage checkpoint | 0.018180843 |
| BP | GO:0044819 | mitotic G1/S transition checkpoint | 0.018180843 |
| BP | GO:0032768 | regulation of monooxygenase activity | 0.019176745 |
| BP | GO:0044783 | G1 DNA damage checkpoint | 0.019176745 |
| BP | GO:0062012 | regulation of small molecule metabolic process | 0.019182311 |
| BP | GO:0003300 | cardiac muscle hypertrophy | 0.019182311 |
| BP | GO:0002082 | regulation of oxidative phosphorylation | 0.019654381 |
| BP | GO:0031572 | G2 DNA damage checkpoint | 0.019654381 |
| BP | GO:0048710 | regulation of astrocyte differentiation | 0.019654381 |
| BP | GO:0043491 | protein kinase B signaling | 0.020371366 |
| BP | GO:0001819 | positive regulation of cytokine production | 0.020405539 |
| BP | GO:0015696 | ammonium transport | 0.020405539 |
| BP | GO:0071156 | regulation of cell cycle arrest | 0.020405539 |
| BP | GO:0031570 | DNA integrity checkpoint | 0.020405539 |
| BP | GO:1905952 | regulation of lipid localization | 0.020405539 |
| BP | GO:0045927 | positive regulation of growth | 0.020569159 |
| BP | GO:0015849 | organic acid transport | 0.020859033 |
| BP | GO:0046942 | carboxylic acid transport | 0.020859033 |
| BP | GO:0043467 | regulation of generation of precursor metabolites and energy | 0.020859033 |
| BP | GO:0014897 | striated muscle hypertrophy | 0.020859033 |
| BP | GO:0051149 | positive regulation of muscle cell differentiation | 0.020859033 |
| BP | GO:0006739 | NADP metabolic process | 0.020859033 |
| BP | GO:0038128 | ERBB2 signaling pathway | 0.020859033 |
| BP | GO:1900745 | positive regulation of p38MAPK cascade | 0.020859033 |
| BP | GO:1902105 | regulation of leukocyte differentiation | 0.021108269 |
| BP | GO:0042326 | negative regulation of phosphorylation | 0.021275275 |
| BP | GO:0019748 | secondary metabolic process | 0.021518481 |
| BP | GO:0032387 | negative regulation of intracellular transport | 0.021518481 |
| BP | GO:0006260 | DNA replication | 0.02188889 |
| BP | GO:0022407 | regulation of cell-cell adhesion | 0.022197765 |
| BP | GO:0014896 | muscle hypertrophy | 0.022197765 |
| BP | GO:0033028 | myeloid cell apoptotic process | 0.022285173 |
| BP | GO:0045736 | negative regulation of cyclin-dependent protein  serine/threonine kinase activity | 0.022285173 |
| BP | GO:0051443 | positive regulation of ubiquitin-protein transferase activity | 0.022285173 |
| BP | GO:0010812 | negative regulation of cell-substrate adhesion | 0.022285173 |
| BP | GO:0016239 | positive regulation of macroautophagy | 0.022285173 |
| BP | GO:0050891 | multicellular organismal water homeostasis | 0.022285173 |
| BP | GO:1903706 | regulation of hemopoiesis | 0.023229997 |
| BP | GO:0048762 | mesenchymal cell differentiation | 0.023376 |
| BP | GO:0007088 | regulation of mitotic nuclear division | 0.023376 |
| BP | GO:0071868 | cellular response to monoamine stimulus | 0.023376 |
| BP | GO:0071870 | cellular response to catecholamine stimulus | 0.023376 |
| BP | GO:0097009 | energy homeostasis | 0.023376 |
| BP | GO:1904030 | negative regulation of cyclin-dependent protein kinase activity | 0.023376 |
| BP | GO:0006560 | proline metabolic process | 0.023376 |
| BP | GO:0014877 | response to muscle inactivity involved in regulation of  muscle adaptation | 0.023376 |
| BP | GO:0014894 | response to denervation involved in regulation of  muscle adaptation | 0.023376 |
| BP | GO:0032308 | positive regulation of prostaglandin secretion | 0.023376 |
| BP | GO:0043653 | mitochondrial fragmentation involved in apoptotic process | 0.023376 |
| BP | GO:0048021 | regulation of melanin biosynthetic process | 0.023376 |
| BP | GO:0051409 | response to nitrosative stress | 0.023376 |
| BP | GO:0060346 | bone trabecula formation | 0.023376 |
| BP | GO:0070091 | glucagon secretion | 0.023376 |
| BP | GO:0070341 | fat cell proliferation | 0.023376 |
| BP | GO:0070344 | regulation of fat cell proliferation | 0.023376 |
| BP | GO:0070391 | response to lipoteichoic acid | 0.023376 |
| BP | GO:0071223 | cellular response to lipoteichoic acid | 0.023376 |
| BP | GO:0140052 | cellular response to oxidised low-density lipoprotein  particle stimulus | 0.023376 |
| BP | GO:2000252 | negative regulation of feeding behavior | 0.023376 |
| BP | GO:2000253 | positive regulation of feeding behavior | 0.023376 |
| BP | GO:2000833 | positive regulation of steroid hormone secretion | 0.023376 |
| BP | GO:0042035 | regulation of cytokine biosynthetic process | 0.023376 |
| BP | GO:0019216 | regulation of lipid metabolic process | 0.023484293 |
| BP | GO:0071695 | anatomical structure maturation | 0.023583261 |
| BP | GO:0050795 | regulation of behavior | 0.024623916 |
| BP | GO:0060251 | regulation of glial cell proliferation | 0.024779705 |
| BP | GO:0045137 | development of primary sexual characteristics | 0.024788919 |
| BP | GO:0007178 | transmembrane receptor protein serine/threonine  kinase signaling pathway | 0.025711459 |
| BP | GO:0010508 | positive regulation of autophagy | 0.025773141 |
| BP | GO:0007160 | cell-matrix adhesion | 0.025880852 |
| BP | GO:0030307 | positive regulation of cell growth | 0.026164628 |
| BP | GO:0002755 | MyD88-dependent toll-like receptor signaling pathway | 0.026344296 |
| BP | GO:0034390 | smooth muscle cell apoptotic process | 0.026344296 |
| BP | GO:0034391 | regulation of smooth muscle cell apoptotic process | 0.026344296 |
| BP | GO:0045740 | positive regulation of DNA replication | 0.026344296 |
| BP | GO:0090322 | regulation of superoxide metabolic process | 0.026344296 |
| BP | GO:0043627 | response to estrogen | 0.026537874 |
| BP | GO:0045685 | regulation of glial cell differentiation | 0.026537874 |
| BP | GO:0001894 | tissue homeostasis | 0.026696716 |
| BP | GO:0051193 | regulation of cofactor metabolic process | 0.026831032 |
| BP | GO:0007162 | negative regulation of cell adhesion | 0.026831032 |
| BP | GO:0051054 | positive regulation of DNA metabolic process | 0.026831032 |
| BP | GO:0001821 | histamine secretion | 0.026831032 |
| BP | GO:0014820 | tonic smooth muscle contraction | 0.026831032 |
| BP | GO:0014870 | response to muscle inactivity | 0.026831032 |
| BP | GO:0032306 | regulation of prostaglandin secretion | 0.026831032 |
| BP | GO:0042482 | positive regulation of odontogenesis | 0.026831032 |
| BP | GO:0043619 | regulation of transcription from RNA polymerase  II promoter in response to oxidative stress | 0.026831032 |
| BP | GO:0045793 | positive regulation of cell size | 0.026831032 |
| BP | GO:0046689 | response to mercury ion | 0.026831032 |
| BP | GO:0071372 | cellular response to follicle-stimulating hormone stimulus | 0.026831032 |
| BP | GO:0031589 | cell-substrate adhesion | 0.026949424 |
| BP | GO:0014015 | positive regulation of gliogenesis | 0.026987643 |
| BP | GO:0030104 | water homeostasis | 0.026987643 |
| BP | GO:0031670 | cellular response to nutrient | 0.026987643 |
| BP | GO:0003015 | heart process | 0.027026768 |
| BP | GO:0051262 | protein tetramerization | 0.027141175 |
| BP | GO:0045730 | respiratory burst | 0.027330632 |
| BP | GO:0001704 | formation of primary germ layer | 0.028005568 |
| BP | GO:0043618 | regulation of transcription from RNA polymerase  II promoter in response to stress | 0.028005568 |
| BP | GO:0010611 | regulation of cardiac muscle hypertrophy | 0.028005568 |
| BP | GO:0072001 | renal system development | 0.028425985 |
| BP | GO:0034101 | erythrocyte homeostasis | 0.028831911 |
| BP | GO:1903578 | regulation of ATP metabolic process | 0.028831911 |
| BP | GO:0032094 | response to food | 0.028991318 |
| BP | GO:0071867 | response to monoamine | 0.028991318 |
| BP | GO:0071869 | response to catecholamine | 0.028991318 |
| BP | GO:0046902 | regulation of mitochondrial membrane permeability | 0.028991318 |
| BP | GO:0048568 | embryonic organ development | 0.029054544 |
| BP | GO:0051047 | positive regulation of secretion | 0.029054544 |
| BP | GO:0050900 | leukocyte migration | 0.029202459 |
| BP | GO:0042089 | cytokine biosynthetic process | 0.029369331 |
| BP | GO:0001933 | negative regulation of protein phosphorylation | 0.029369331 |
| BP | GO:0031331 | positive regulation of cellular catabolic process | 0.029369331 |
| BP | GO:0051897 | positive regulation of protein kinase B signaling | 0.029369331 |
| BP | GO:0001818 | negative regulation of cytokine production | 0.029448955 |
| BP | GO:0048608 | reproductive structure development | 0.02973454 |
| BP | GO:0014066 | regulation of phosphatidylinositol 3-kinase signaling | 0.02973454 |
| BP | GO:0042107 | cytokine metabolic process | 0.02973454 |
| BP | GO:0051209 | release of sequestered calcium ion into cytosol | 0.02973454 |
| BP | GO:0007077 | mitotic nuclear envelope disassembly | 0.02973454 |
| BP | GO:0030157 | pancreatic juice secretion | 0.02973454 |
| BP | GO:0031507 | heterochromatin assembly | 0.02973454 |
| BP | GO:0033197 | response to vitamin E | 0.02973454 |
| BP | GO:0042416 | dopamine biosynthetic process | 0.02973454 |
| BP | GO:0045080 | positive regulation of chemokine biosynthetic process | 0.02973454 |
| BP | GO:0045579 | positive regulation of B cell differentiation | 0.02973454 |
| BP | GO:0051549 | positive regulation of keratinocyte migration | 0.02973454 |
| BP | GO:0051608 | histamine transport | 0.02973454 |
| BP | GO:0070493 | thrombin-activated receptor signaling pathway | 0.02973454 |
| BP | GO:1900376 | regulation of secondary metabolite biosynthetic process | 0.02973454 |
| BP | GO:1901298 | regulation of hydrogen peroxide-mediated programmed  cell death | 0.02973454 |
| BP | GO:0010661 | positive regulation of muscle cell apoptotic process | 0.029814446 |
| BP | GO:0071216 | cellular response to biotic stimulus | 0.029832588 |
| BP | GO:0018105 | peptidyl-serine phosphorylation | 0.030112155 |
| BP | GO:0008306 | associative learning | 0.030112155 |
| BP | GO:0014743 | regulation of muscle hypertrophy | 0.030112155 |
| BP | GO:0055021 | regulation of cardiac muscle tissue growth | 0.030112155 |
| BP | GO:0090398 | cellular senescence | 0.030112155 |
| BP | GO:0031669 | cellular response to nutrient levels | 0.030206852 |
| BP | GO:0061458 | reproductive system development | 0.030300495 |
| BP | GO:2001235 | positive regulation of apoptotic signaling pathway | 0.030399069 |
| BP | GO:0051283 | negative regulation of sequestering of calcium ion | 0.030845354 |
| BP | GO:0050804 | modulation of chemical synaptic transmission | 0.031117223 |
| BP | GO:0030193 | regulation of blood coagulation | 0.031185195 |
| BP | GO:0001941 | postsynaptic membrane organization | 0.031268932 |
| BP | GO:0045823 | positive regulation of heart contraction | 0.031268932 |
| BP | GO:0099177 | regulation of trans-synaptic signaling | 0.031398433 |
| BP | GO:0045727 | positive regulation of translation | 0.031565242 |
| BP | GO:0002088 | lens development in camera-type eye | 0.03224112 |
| BP | GO:1900046 | regulation of hemostasis | 0.03224112 |
| BP | GO:0008217 | regulation of blood pressure | 0.03224112 |
| BP | GO:0010821 | regulation of mitochondrion organization | 0.03224112 |
| BP | GO:0042593 | glucose homeostasis | 0.03224112 |
| BP | GO:0051282 | regulation of sequestering of calcium ion | 0.03224112 |
| BP | GO:0051291 | protein heterooligomerization | 0.03224112 |
| BP | GO:0033500 | carbohydrate homeostasis | 0.032833985 |
| BP | GO:0070317 | negative regulation of G0 to G1 transition | 0.03291131 |
| BP | GO:0031145 | anaphase-promoting complex-dependent catabolic process | 0.033046854 |
| BP | GO:0033238 | regulation of cellular amine metabolic process | 0.033046854 |
| BP | GO:0043568 | positive regulation of insulin-like growth factor  receptor signaling pathway | 0.033046854 |
| BP | GO:0061430 | bone trabecula morphogenesis | 0.033046854 |
| BP | GO:0061469 | regulation of type B pancreatic cell proliferation | 0.033046854 |
| BP | GO:0098712 | L-glutamate import across plasma membrane | 0.033046854 |
| BP | GO:1900225 | regulation of NLRP3 inflammasome complex assembly | 0.033046854 |
| BP | GO:0051098 | regulation of binding | 0.033155432 |
| BP | GO:0046328 | regulation of JNK cascade | 0.034150667 |
| BP | GO:0071158 | positive regulation of cell cycle arrest | 0.034242848 |
| BP | GO:0010613 | positive regulation of cardiac muscle hypertrophy | 0.034530272 |
| BP | GO:0051154 | negative regulation of striated muscle cell differentiation | 0.034530272 |
| BP | GO:0051208 | sequestering of calcium ion | 0.034655339 |
| BP | GO:2000106 | regulation of leukocyte apoptotic process | 0.035504422 |
| BP | GO:0042476 | odontogenesis | 0.035540212 |
| BP | GO:0045598 | regulation of fat cell differentiation | 0.035540212 |
| BP | GO:0055007 | cardiac muscle cell differentiation | 0.035540212 |
| BP | GO:0048285 | organelle fission | 0.036081991 |
| BP | GO:0006367 | transcription initiation from RNA polymerase II promoter | 0.036195566 |
| BP | GO:0051783 | regulation of nuclear division | 0.036195566 |
| BP | GO:0014742 | positive regulation of muscle hypertrophy | 0.036195566 |
| BP | GO:0071364 | cellular response to epidermal growth factor stimulus | 0.036195566 |
| BP | GO:1904646 | cellular response to amyloid-beta | 0.036195566 |
| BP | GO:0010507 | negative regulation of autophagy | 0.036195566 |
| BP | GO:0050818 | regulation of coagulation | 0.036195566 |
| BP | GO:0050886 | endocrine process | 0.036195566 |
| BP | GO:0060420 | regulation of heart growth | 0.036195566 |
| BP | GO:0045926 | negative regulation of growth | 0.036195566 |
| BP | GO:0006268 | DNA unwinding involved in DNA replication | 0.036195566 |
| BP | GO:0010421 | hydrogen peroxide-mediated programmed cell death | 0.036195566 |
| BP | GO:0010935 | regulation of macrophage cytokine production | 0.036195566 |
| BP | GO:0032310 | prostaglandin secretion | 0.036195566 |
| BP | GO:0035810 | positive regulation of urine volume | 0.036195566 |
| BP | GO:0043455 | regulation of secondary metabolic process | 0.036195566 |
| BP | GO:0044546 | NLRP3 inflammasome complex assembly | 0.036195566 |
| BP | GO:0051547 | regulation of keratinocyte migration | 0.036195566 |
| BP | GO:0051938 | L-glutamate import | 0.036195566 |
| BP | GO:0072425 | signal transduction involved in G2 DNA  damage checkpoint | 0.036195566 |
| BP | GO:0097468 | programmed cell death in response to reactive  oxygen species | 0.036195566 |
| BP | GO:1901626 | regulation of postsynaptic membrane organization | 0.036195566 |
| BP | GO:0007006 | mitochondrial membrane organization | 0.036195566 |
| BP | GO:0030260 | entry into host cell | 0.036195566 |
| BP | GO:0044409 | entry into host | 0.036195566 |
| BP | GO:0051806 | entry into cell of other organism involved in  symbiotic interaction | 0.036195566 |
| BP | GO:0051828 | entry into other organism involved in symbiotic interaction | 0.036195566 |
| BP | GO:1904705 | regulation of vascular smooth muscle cell proliferation | 0.036637507 |
| BP | GO:1990874 | vascular smooth muscle cell proliferation | 0.036637507 |
| BP | GO:0014002 | astrocyte development | 0.037098149 |
| BP | GO:0090311 | regulation of protein deacetylation | 0.037098149 |
| BP | GO:0032760 | positive regulation of tumor necrosis factor production | 0.037876587 |
| BP | GO:0042446 | hormone biosynthetic process | 0.037876587 |
| BP | GO:0090559 | regulation of membrane permeability | 0.037876587 |
| BP | GO:0044272 | sulfur compound biosynthetic process | 0.037943561 |
| BP | GO:0050731 | positive regulation of peptidyl-tyrosine phosphorylation | 0.037943561 |
| BP | GO:0070316 | regulation of G0 to G1 transition | 0.039136018 |
| BP | GO:0014068 | positive regulation of phosphatidylinositol 3-kinase signaling | 0.039197473 |
| BP | GO:0009308 | amine metabolic process | 0.040132698 |
| BP | GO:0050730 | regulation of peptidyl-tyrosine phosphorylation | 0.040239871 |
| BP | GO:0001667 | ameboidal-type cell migration | 0.040239871 |
| BP | GO:0034616 | response to laminar fluid shear stress | 0.040239871 |
| BP | GO:0043249 | erythrocyte maturation | 0.040239871 |
| BP | GO:0070365 | hepatocyte differentiation | 0.040239871 |
| BP | GO:1900037 | regulation of cellular response to hypoxia | 0.040239871 |
| BP | GO:1903557 | positive regulation of tumor necrosis factor  superfamily cytokine production | 0.040239871 |
| BP | GO:2000177 | regulation of neural precursor cell proliferation | 0.040239871 |
| BP | GO:0023061 | signal release | 0.040539377 |
| BP | GO:0046394 | carboxylic acid biosynthetic process | 0.040539377 |
| BP | GO:0001504 | neurotransmitter uptake | 0.040733861 |
| BP | GO:0022602 | ovulation cycle process | 0.040733861 |
| BP | GO:0016053 | organic acid biosynthetic process | 0.04094679 |
| BP | GO:0097306 | cellular response to alcohol | 0.041479578 |
| BP | GO:0001837 | epithelial to mesenchymal transition | 0.041508893 |
| BP | GO:0046330 | positive regulation of JNK cascade | 0.041508893 |
| BP | GO:0097553 | calcium ion transmembrane import into cytosol | 0.041508893 |
| BP | GO:0043303 | mast cell degranulation | 0.042550613 |
| BP | GO:0045023 | G0 to G1 transition | 0.042550613 |
| BP | GO:0061614 | pri-miRNA transcription by RNA polymerase II | 0.042550613 |
| BP | GO:0070849 | response to epidermal growth factor | 0.042550613 |
| BP | GO:1900744 | regulation of p38MAPK cascade | 0.042550613 |
| BP | GO:0010717 | regulation of epithelial to mesenchymal transition | 0.042550613 |
| BP | GO:0007179 | transforming growth factor beta receptor signaling pathway | 0.043057852 |
| BP | GO:0050866 | negative regulation of cell activation | 0.043057852 |
| BP | GO:0038127 | ERBB signaling pathway | 0.043415778 |
| BP | GO:0001780 | neutrophil homeostasis | 0.043666745 |
| BP | GO:0007567 | parturition | 0.043666745 |
| BP | GO:0010566 | regulation of ketone biosynthetic process | 0.043666745 |
| BP | GO:0010934 | macrophage cytokine production | 0.043666745 |
| BP | GO:0030214 | hyaluronan catabolic process | 0.043666745 |
| BP | GO:0030397 | membrane disassembly | 0.043666745 |
| BP | GO:0032305 | positive regulation of icosanoid secretion | 0.043666745 |
| BP | GO:0032354 | response to follicle-stimulating hormone | 0.043666745 |
| BP | GO:0051081 | nuclear envelope disassembly | 0.043666745 |
| BP | GO:0070293 | renal absorption | 0.043666745 |
| BP | GO:0097067 | cellular response to thyroid hormone stimulus | 0.043666745 |
| BP | GO:1990000 | amyloid fibril formation | 0.043666745 |
| BP | GO:0106106 | cold-induced thermogenesis | 0.043679364 |
| BP | GO:0120161 | regulation of cold-induced thermogenesis | 0.043679364 |
| BP | GO:0001774 | microglial cell activation | 0.043679364 |
| BP | GO:0002269 | leukocyte activation involved in inflammatory response | 0.043679364 |
| BP | GO:0002279 | mast cell activation involved in immune response | 0.043679364 |
| BP | GO:0009069 | serine family amino acid metabolic process | 0.043679364 |
| BP | GO:0055023 | positive regulation of cardiac muscle tissue growth | 0.043679364 |
| BP | GO:0001655 | urogenital system development | 0.04399325 |
| BP | GO:0051235 | maintenance of location | 0.04399325 |
| BP | GO:0031330 | negative regulation of cellular catabolic process | 0.04409175 |
| BP | GO:0140014 | mitotic nuclear division | 0.04409175 |
| BP | GO:0030534 | adult behavior | 0.044412115 |
| BP | GO:0008202 | steroid metabolic process | 0.04450532 |
| BP | GO:0050769 | positive regulation of neurogenesis | 0.045241252 |
| BP | GO:0071901 | negative regulation of protein serine/threonine  kinase activity | 0.045396075 |
| BP | GO:1901184 | regulation of ERBB signaling pathway | 0.045396075 |
| BP | GO:0002448 | mast cell mediated immunity | 0.045396075 |
| BP | GO:0030857 | negative regulation of epithelial cell differentiation | 0.045396075 |
| BP | GO:0051445 | regulation of meiotic cell cycle | 0.045396075 |
| BP | GO:1904707 | positive regulation of vascular smooth muscle  cell proliferation | 0.045396075 |
| BP | GO:0032147 | activation of protein kinase activity | 0.045541659 |
| BP | GO:0045785 | positive regulation of cell adhesion | 0.045645402 |
| BP | GO:0072331 | signal transduction by p53 class mediator | 0.045970014 |
| BP | GO:0051289 | protein homotetramerization | 0.046768774 |
| BP | GO:0071222 | cellular response to lipopolysaccharide | 0.046787654 |
| BP | GO:0060070 | canonical Wnt signaling pathway | 0.046787654 |
| BP | GO:0006590 | thyroid hormone generation | 0.046813779 |
| BP | GO:0010224 | response to UV-B | 0.046813779 |
| BP | GO:0010715 | regulation of extracellular matrix disassembly | 0.046813779 |
| BP | GO:0015732 | prostaglandin transport | 0.046813779 |
| BP | GO:0032966 | negative regulation of collagen biosynthetic process | 0.046813779 |
| BP | GO:0035729 | cellular response to hepatocyte growth factor stimulus | 0.046813779 |
| BP | GO:0048521 | negative regulation of behavior | 0.046813779 |
| BP | GO:0007249 | I-kappaB kinase/NF-kappaB signaling | 0.046813779 |
| BP | GO:0007596 | blood coagulation | 0.046813779 |
| BP | GO:0014009 | glial cell proliferation | 0.046813779 |
| BP | GO:1900087 | positive regulation of G1/S transition of  mitotic cell cycle | 0.046813779 |
| BP | GO:2000725 | regulation of cardiac muscle cell differentiation | 0.046813779 |
| BP | GO:0002702 | positive regulation of production of molecular  mediator of immune response | 0.047316909 |
| BP | GO:0042116 | macrophage activation | 0.047316909 |
| BP | GO:0110020 | regulation of actomyosin structure organization | 0.047316909 |
| BP | GO:0007159 | leukocyte cell-cell adhesion | 0.047316909 |
| BP | GO:0007548 | sex differentiation | 0.047316909 |
| BP | GO:0045165 | cell fate commitment | 0.047316909 |
| BP | GO:0050808 | synapse organization | 0.047638254 |
| BP | GO:0060537 | muscle tissue development | 0.047638254 |
| BP | GO:0050670 | regulation of lymphocyte proliferation | 0.048547516 |
| BP | GO:0008277 | regulation of G protein-coupled receptor signaling pathway | 0.048547516 |
| BP | GO:0019217 | regulation of fatty acid metabolic process | 0.048587089 |
| BP | GO:0097366 | response to bronchodilator | 0.048631985 |
| BP | GO:0034248 | regulation of cellular amide metabolic process | 0.04866625 |
| BP | GO:0032944 | regulation of mononuclear cell proliferation | 0.049358805 |
| BP | GO:0061448 | connective tissue development | 0.049478949 |
| BP | GO:0007599 | hemostasis | 0.049784401 |
| BP | GO:0015908 | fatty acid transport | 0.049871935 |
| BP | GO:0044773 | mitotic DNA damage checkpoint | 0.049871935 |
| BP | GO:0009144 | purine nucleoside triphosphate metabolic process | 0.049954466 |
| BP | GO:0033044 | regulation of chromosome organization | 0.049954466 |
| BP | GO:0050817 | coagulation | 0.049954466 |
| BP | GO:0045839 | negative regulation of mitotic nuclear division | 0.049954466 |
| BP | GO:0051438 | regulation of ubiquitin-protein transferase activity | 0.049954466 |
| BP | GO:0060421 | positive regulation of heart growth | 0.049954466 |
| BP | GO:0009084 | glutamine family amino acid biosynthetic process | 0.049954466 |
| BP | GO:0010713 | negative regulation of collagen metabolic process | 0.049954466 |
| BP | GO:0021756 | striatum development | 0.049954466 |
| BP | GO:0035994 | response to muscle stretch | 0.049954466 |
| BP | GO:0044320 | cellular response to leptin stimulus | 0.049954466 |
| BP | GO:0045683 | negative regulation of epidermis development | 0.049954466 |
| BP | GO:0070633 | transepithelial transport | 0.049954466 |
| BP | GO:0150078 | positive regulation of neuroinflammatory response | 0.049954466 |
| BP | GO:2000193 | positive regulation of fatty acid transport | 0.049954466 |
| CC | GO:0043020 | NADPH oxidase complex | 4.64329E-07 |
| CC | GO:0005667 | transcription factor complex | 0.000366956 |
| CC | GO:1990204 | oxidoreductase complex | 0.000476155 |
| CC | GO:0005791 | rough endoplasmic reticulum | 0.000564807 |
| CC | GO:0090575 | RNA polymerase II transcription factor complex | 0.000591409 |
| CC | GO:0045177 | apical part of cell | 0.000952595 |
| CC | GO:0071682 | endocytic vesicle lumen | 0.000952595 |
| CC | GO:0101002 | ficolin-1-rich granule | 0.001017088 |
| CC | GO:0000152 | nuclear ubiquitin ligase complex | 0.001021347 |
| CC | GO:0030139 | endocytic vesicle | 0.001417347 |
| CC | GO:0044798 | nuclear transcription factor complex | 0.001417347 |
| CC | GO:0005788 | endoplasmic reticulum lumen | 0.001535857 |
| CC | GO:0045178 | basal part of cell | 0.001636014 |
| CC | GO:0016324 | apical plasma membrane | 0.001702815 |
| CC | GO:1904813 | ficolin-1-rich granule lumen | 0.001755068 |
| CC | GO:0031838 | haptoglobin-hemoglobin complex | 0.001846928 |
| CC | GO:0005833 | hemoglobin complex | 0.002209783 |
| CC | GO:0060205 | cytoplasmic vesicle lumen | 0.002209783 |
| CC | GO:0031983 | vesicle lumen | 0.002209783 |
| CC | GO:0009925 | basal plasma membrane | 0.00291624 |
| CC | GO:0035102 | PRC1 complex | 0.00378712 |
| CC | GO:0043025 | neuronal cell body | 0.003968611 |
| CC | GO:0000307 | cyclin-dependent protein kinase holoenzyme complex | 0.005813872 |
| CC | GO:0031519 | PcG protein complex | 0.008598482 |
| CC | GO:0005759 | mitochondrial matrix | 0.024985325 |
| CC | GO:0005925 | focal adhesion | 0.025214751 |
| CC | GO:1902911 | protein kinase complex | 0.025214751 |
| CC | GO:0005924 | cell-substrate adherens junction | 0.025214751 |
| CC | GO:0016323 | basolateral plasma membrane | 0.025214751 |
| CC | GO:0000781 | chromosome, telomeric region | 0.025214751 |
| CC | GO:0030055 | cell-substrate junction | 0.025214751 |
| CC | GO:0034663 | endoplasmic reticulum chaperone complex | 0.037685395 |
| CC | GO:0000792 | heterochromatin | 0.041032514 |
| CC | GO:0097449 | astrocyte projection | 0.042331964 |
| CC | GO:0043204 | perikaryon | 0.049910369 |
| MF | GO:0016209 | antioxidant activity | 1.12269E-18 |
| MF | GO:0016684 | oxidoreductase activity, acting on peroxide as acceptor | 4.32071E-16 |
| MF | GO:0004601 | peroxidase activity | 3.8072E-15 |
| MF | GO:0020037 | heme binding | 3.19317E-09 |
| MF | GO:0046906 | tetrapyrrole binding | 6.74569E-09 |
| MF | GO:0016175 | superoxide-generating NADPH oxidase activity | 3.9887E-08 |
| MF | GO:0050664 | oxidoreductase activity, acting on NAD(P)H,  oxygen as acceptor | 4.40784E-07 |
| MF | GO:0050662 | coenzyme binding | 7.30584E-07 |
| MF | GO:0050661 | NADP binding | 1.25826E-06 |
| MF | GO:0019825 | oxygen binding | 1.60494E-06 |
| MF | GO:0005344 | oxygen carrier activity | 5.16672E-06 |
| MF | GO:0016651 | oxidoreductase activity, acting on NAD(P)H | 2.57304E-05 |
| MF | GO:0016667 | oxidoreductase activity, acting on a sulfur group of donors | 3.75199E-05 |
| MF | GO:0035035 | histone acetyltransferase binding | 0.000215346 |
| MF | GO:0050660 | flavin adenine dinucleotide binding | 0.00026664 |
| MF | GO:0009055 | electron transfer activity | 0.000319364 |
| MF | GO:0043177 | organic acid binding | 0.000592114 |
| MF | GO:0004602 | glutathione peroxidase activity | 0.000993934 |
| MF | GO:0030544 | Hsp70 protein binding | 0.00103196 |
| MF | GO:0005506 | iron ion binding | 0.002025332 |
| MF | GO:0031720 | haptoglobin binding | 0.002035785 |
| MF | GO:0140104 | molecular carrier activity | 0.003031266 |
| MF | GO:0004713 | protein tyrosine kinase activity | 0.005160611 |
| MF | GO:0035173 | histone kinase activity | 0.009536609 |
| MF | GO:0015036 | disulfide oxidoreductase activity | 0.009536609 |
| MF | GO:0001228 | DNA-binding transcription activator activity,  RNA polymerase II-specific | 0.014545716 |
| MF | GO:0016538 | cyclin-dependent protein serine/threonine  kinase regulator activity | 0.019197815 |
| MF | GO:0015238 | drug transmembrane transporter activity | 0.027536766 |
| MF | GO:0051427 | hormone receptor binding | 0.027536766 |
| MF | GO:0019838 | growth factor binding | 0.027536766 |
| MF | GO:0031406 | carboxylic acid binding | 0.032403894 |
| MF | GO:0016597 | amino acid binding | 0.032403894 |
| MF | GO:0004674 | protein serine/threonine kinase activity | 0.036101729 |
| MF | GO:0004714 | transmembrane receptor protein tyrosine kinase activity | 0.036101729 |
| MF | GO:0097472 | cyclin-dependent protein kinase activity | 0.036101729 |
| MF | GO:0015175 | neutral amino acid transmembrane transporter activity | 0.037630222 |
| MF | GO:0035257 | nuclear hormone receptor binding | 0.037630222 |
| MF | GO:0005217 | intracellular ligand-gated ion channel activity | 0.043792464 |
| MF | GO:0016595 | glutamate binding | 0.045135643 |

Note: BP, biological process; CC, cell composition; MF, molecular function.
